# Supplementary material for: Multiple irradiation triggered the formation of luminescent LaVO4: Ln3+ nanorods and in cellulose gels
Source: Royal Society of Chemistry journal article supplement (doi:10.1039/c2ce25231g), 2012-01-01
Supplement: c2ce25231g.pdf [file c2ce25231g.pdf]

*Supporting information for*

Multiple irradiation triggered the formation of luminescent

LaVO<sub>4</sub>: Ln<sup>3+</sup> nanorods and in cellulose gels

Qianming Wang<sup>a,b</sup>, Zhengyang Zhang<sup>b</sup>, Yuhui Zheng<sup>b,\*</sup>, Weisheng Cai<sup>b</sup>, Yifei Yu<sup>b</sup>,

<sup>a</sup> *Key Laboratory of Theoretical Chemistry of Environment, Ministry of Education,*

*School of Chemistry and Environment, South China Normal University, Guangzhou 510006,*

*P. R. China*

<sup>b</sup> *School of Chemistry and Environment, South China Normal University, Guangzhou 510006,*

*P. R. China*

\* To whom the correspondence should be addressed. E-mail: [yhzheng78@scnu.edu.cn](mailto:yhzheng78@scnu.edu.cn)

Tel: 86-20-39310579; Fax: 86-20-39310187

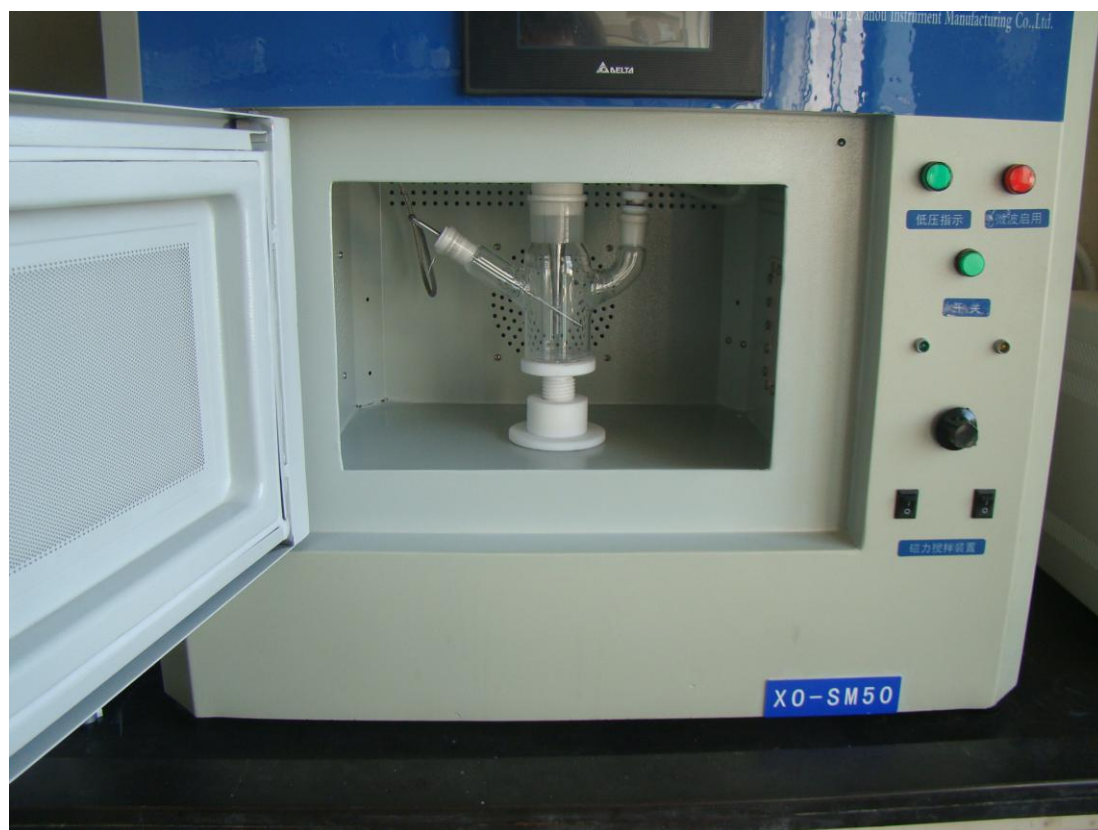

Figure S1. The supersonic assisted microwave reactor

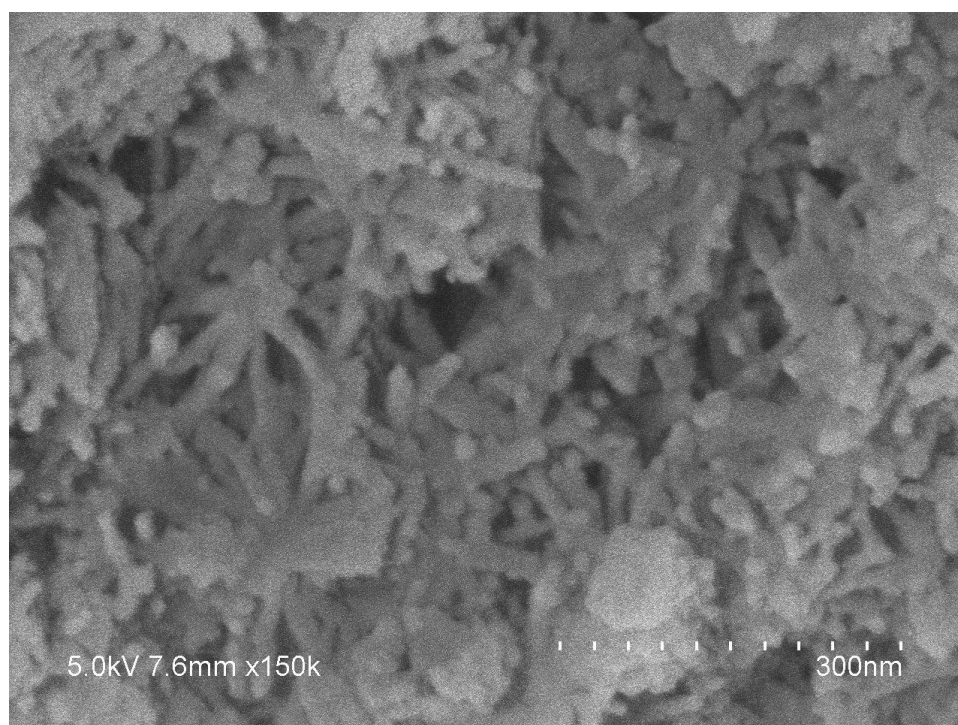

Figure S2. SEM image of  $\text{LaVO}_4:\text{Tb}^{3+}$  prepared by the SMC method with a 25-minute reaction time.

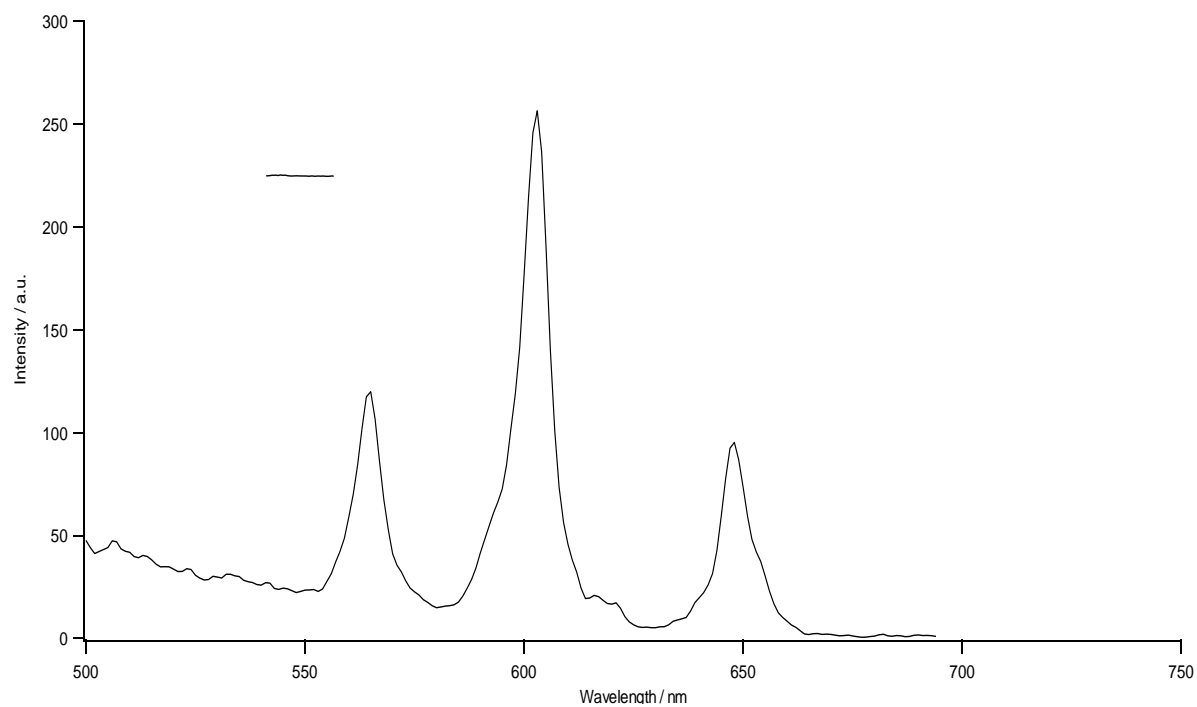

Figure S3. Emission spectra of  $\text{LaVO}_4:\text{Sm}^{3+}$  entrapped in cellulose gel (Ex = 405 nm).

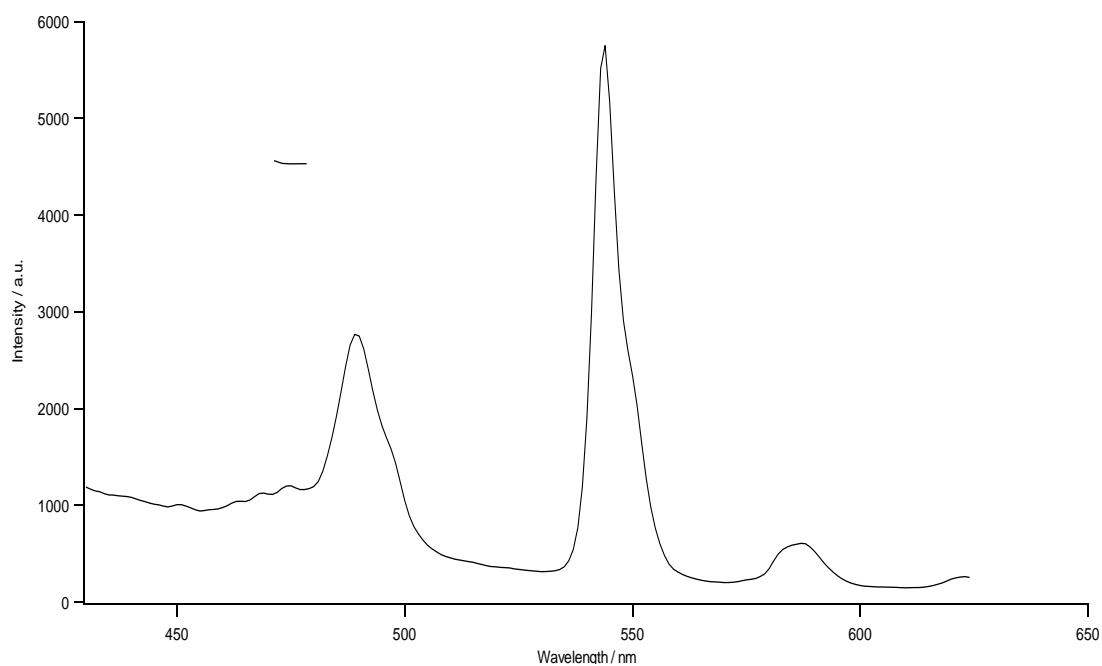

Figure S4. Emission spectra of  $\text{LaVO}_4:\text{Tb}^{3+}$  entrapped in cellulose gel (Ex = 280 nm).

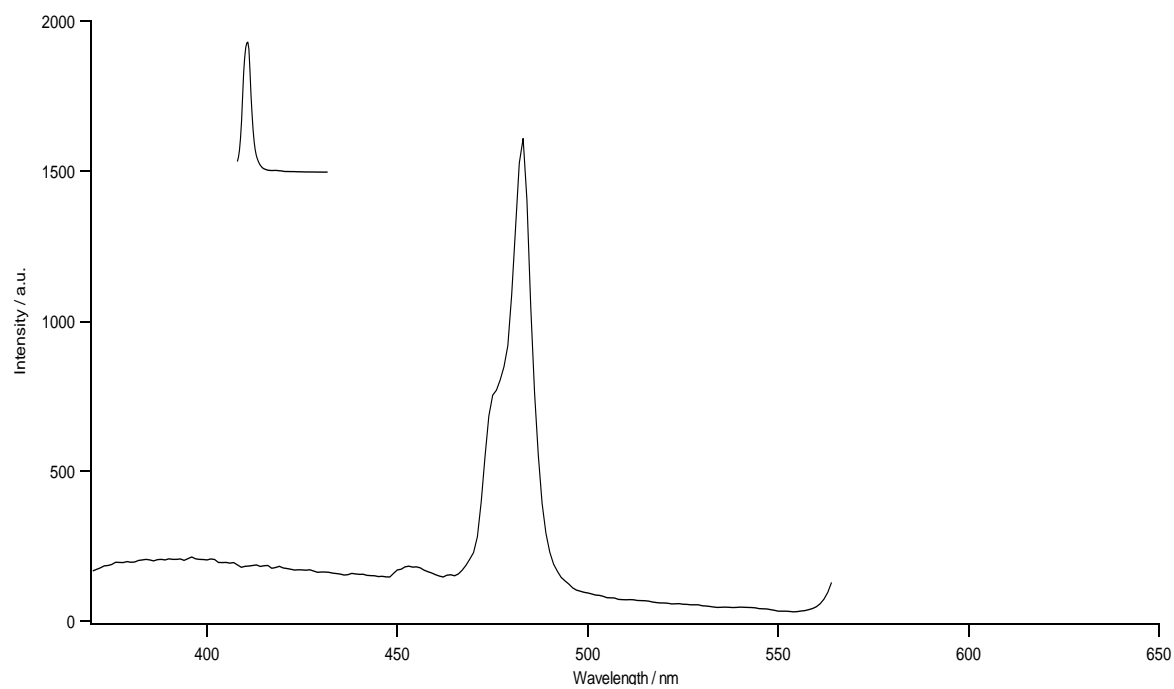

Figure S5. Emission spectra of LaVO<sub>4</sub>:Dy<sup>3+</sup> entrapped in cellulose gel (Ex = 290 nm).
